# Supplementary material for: Influence of shape on crystal structure and optical properties of heterocyclic conjugated molecules
Source: Royal Society of Chemistry journal article supplement (doi:10.1039/d4tc03509g), 2024-10-31

## checkCIF/PLATON report

Structure factors have been supplied for datablock(s) P22313\_t5

THIS REPORT IS FOR GUIDANCE ONLY. IF USED AS PART OF A REVIEW PROCEDURE FOR PUBLICATION, IT SHOULD NOT REPLACE THE EXPERTISE OF AN EXPERIENCED CRYSTALLOGRAPHIC REFEREE.

No syntax errors found. CIF dictionary Interpreting this report

**Datablock: P22313\_t5**

|                 |                |                   |                    |
|-----------------|----------------|-------------------|--------------------|
| Bond precision: | C-C = 0.0099 A |                   | Wavelength=1.54178 |
| Cell:           | a=29.4547 (10) | b=6.6980 (3)      | c=8.0253 (3)       |
|                 | alpha=90       | beta=95.5699 (18) | gamma=90           |
| Temperature:    | 100 K          |                   |                    |

|                        | Calculated        | Reported          |
|------------------------|-------------------|-------------------|
| Volume                 | 1575.82 (11)      | 1575.82 (11)      |
| Space group            | P 21/c            | P 21/c            |
| Hall group             | -P 2ybc           | -P 2ybc           |
| Moiety formula         | C38 H14 F10 O4 S2 | ?                 |
| Sum formula            | C38 H14 F10 O4 S2 | C38 H14 F10 O4 S2 |
| Mr                     | 788.61            | 788.61            |
| Dx, g cm <sup>-3</sup> | 1.662             | 1.662             |
| Z                      | 2                 | 2                 |
| Mu (mm <sup>-1</sup> ) | 2.483             | 2.483             |
| F000                   | 792.0             | 792.0             |
| F000'                  | 796.49            |                   |
| h, k, l <sub>max</sub> | 37, 8, 10         | 37, 8, 9          |
| Nref                   | 3350              | 4344              |
| Tmin, Tmax             | 0.789, 0.862      | 0.262, 0.427      |
| Tmin'                  | 0.716             |                   |

```
Correction method= # Reported T Limits: Tmin=0.262 Tmax=0.427
AbsCorr = MULTI-SCAN
```

Data completeness= 1.297                      Theta (max)= 77.366

|                               |                                 |
|-------------------------------|---------------------------------|
| R(reflections)= 0.1385( 3811) | wR2(reflections)= 0.3927( 4344) |
| S = 3.109                     | Npar= 264                       |

---

The following ALERTS were generated. Each ALERT has the format

**test-name\_ALERT\_alert-type\_alert-level.**

Click on the hyperlinks for more details of the test.

---

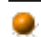

### Alert level B

PLAT084\_ALERT\_3\_B High wR2 Value (i.e. > 0.25) ..... 0.39 Report

**Author Response: The crystal quality was exceptionally low and the data quality reflects this.**

PLAT097\_ALERT\_2\_B Large Reported Max. (Positive) Residual Density 2.37 eA-3

**Author Response: The crystal quality was exceptionally low and not all twinning could be resolved (there likely is a third twin domain). The highest residual electron density peaks are not in sensible positions where they could correspond to additional atoms or missed disorder. More likely, those maxima are artefacts of unresolved non-merohedral twinning.**

---

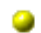

### Alert level C

DIFMX02\_ALERT\_1\_C The maximum difference density is > 0.1\*ZMAX\*0.75

The relevant atom site should be identified.

GOODF01\_ALERT\_2\_C The least squares goodness of fit parameter lies outside the range 0.80 <> 2.00

Goodness of fit given = 3.109

PLAT029\_ALERT\_3\_C \_diffn\_measured\_fraction\_theta\_full value Low . 0.972 Why?  
PLAT082\_ALERT\_2\_C High R1 Value ..... 0.14 Report  
PLAT085\_ALERT\_2\_C SHELXL Default Weighting Scheme is not Optimized Please Check  
PLAT087\_ALERT\_2\_C Unsatisfactory S value (Too High) ..... 3.11 Check  
PLAT094\_ALERT\_2\_C Ratio of Maximum / Minimum Residual Density .... 2.58 Report  
PLAT340\_ALERT\_3\_C Low Bond Precision on C-C Bonds ..... 0.00994 Ang.  
PLAT906\_ALERT\_3\_C Large K Value in the Analysis of Variance ..... 8.177 Check  
PLAT906\_ALERT\_3\_C Large K Value in the Analysis of Variance ..... 4.611 Check  
PLAT911\_ALERT\_3\_C Missing FCF Refl Between Thmin & STh/L= 0.600 80 Report

|    |   |    |    |   |    |    |   |    |     |   |    |    |   |    |    |   |    |
|----|---|----|----|---|----|----|---|----|-----|---|----|----|---|----|----|---|----|
| 0  | 4 | 0, | 0  | 8 | 0, | 1  | 8 | 0, | 2   | 8 | 0, | -5 | 0 | 2, | -4 | 0 | 2, |
| -2 | 6 | 3, | 2  | 7 | 3, | 9  | 6 | 3, | -11 | 0 | 4, | -9 | 1 | 4, | -6 | 0 | 4, |
| -5 | 0 | 4, | -3 | 0 | 4, | -3 | 7 | 4, | -2  | 7 | 4, | 0  | 6 | 4, | 0  | 7 | 4, |
| 1  | 6 | 4, | 1  | 7 | 4, | 2  | 6 | 4, | 2   | 7 | 4, | 3  | 6 | 4, | 3  | 7 | 4, |
| 4  | 6 | 4, | 5  | 6 | 4, | 6  | 7 | 4, | -6  | 6 | 5, | -1 | 6 | 5, | 0  | 6 | 5, |
| 1  | 6 | 5, | 2  | 6 | 5, | 3  | 6 | 5, | 4   | 6 | 5, | -9 | 6 | 6, | -8 | 5 | 6, |
| -8 | 6 | 6, | -7 | 5 | 6, | -7 | 6 | 6, | -5  | 0 | 6, | -4 | 0 | 6, | -4 | 5 | 6, |
| -4 | 6 | 6, | -3 | 0 | 6, | -3 | 6 | 6, | -2  | 6 | 6, | -1 | 6 | 6, | 0  | 6 | 6, |
| 1  | 6 | 6, | 2  | 6 | 6, | 4  | 6 | 6, | -3  | 3 | 7, | -1 | 5 | 7, | -8 | 3 | 8, |
| -7 | 3 | 8, | -6 | 2 | 8, | -6 | 3 | 8, | -5  | 3 | 8, | -4 | 2 | 8, | -3 | 2 | 8, |
| -1 | 3 | 8, | 0  | 2 | 8, | 0  | 3 | 8, | 1   | 2 | 8, | 1  | 3 | 8, | 2  | 3 | 8, |
| 5  | 4 | 8, | 6  | 3 | 8, | 7  | 3 | 8, | 13  | 0 | 8, | -9 | 2 | 9, | -7 | 2 | 9, |
| -6 | 2 | 9, | -5 | 2 | 9, | -2 | 2 | 9, | 0   | 2 | 9, | 1  | 2 | 9, | 2  | 2 | 9, |
| 3  | 2 | 9, | 5  | 2 | 9, |    |   |    |     |   |    |    |   |    |    |   |    |

---

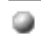

### Alert level G

|                   |                                                            |        |              |
|-------------------|------------------------------------------------------------|--------|--------------|
| PLAT002_ALERT_2_G | Number of Distance or Angle Restraints on AtSite           | 6      | Note         |
| PLAT003_ALERT_2_G | Number of Uiso or U(i,j) Restrained non-H Atoms            | 29     | Report       |
| PLAT174_ALERT_4_G | The CIF-Embedded .res File Contains FLAT Records           | 2      | Report       |
| PLAT176_ALERT_4_G | The CIF-Embedded .res File Contains SADI Records           | 5      | Report       |
| PLAT178_ALERT_4_G | The CIF-Embedded .res File Contains SIMU Records           | 1      | Report       |
| PLAT187_ALERT_4_G | The CIF-Embedded .res File Contains RIGU Records           | 1      | Report       |
| PLAT191_ALERT_3_G | A Non-default SADI Restraint Value has been used           | 0.0100 | Report       |
| PLAT191_ALERT_3_G | A Non-default SADI Restraint Value has been used           | 0.0100 | Report       |
| PLAT301_ALERT_3_G | Main Residue Disorder ..... (Resd 1)                       | 7%     | Note         |
| PLAT371_ALERT_2_G | Long C(sp2)-C(sp1) Bond C5 - C6 .                          | 1.44   | Ang.         |
| PLAT432_ALERT_2_G | Short Inter X...Y Contact S1A ..C4 .                       | 3.26   | Ang.         |
|                   | $x, 3/2-y, 1/2+z =$                                        | 4_576  | Check        |
| PLAT434_ALERT_2_G | Short Inter HL..HL Contact F3 ..F4 .                       | 2.79   | Ang.         |
|                   | $2-x, -1/2+y, 3/2-z =$                                     | 2_746  | Check        |
| PLAT860_ALERT_3_G | Number of Least-Squares Restraints .....                   | 426    | Note         |
| PLAT870_ALERT_4_G | ALERTS Related to Twinning Effects Suppressed ..           | !      | Info         |
| PLAT912_ALERT_4_G | Missing # of FCF Reflections Above STh/L= 0.600            | 91     | Note         |
| PLAT941_ALERT_3_G | Average HKL Measurement Multiplicity .....                 | 1.4    | Low          |
| PLAT965_ALERT_2_G | The SHELXL WEIGHT Optimisation has not Converged           |        | Please Check |
| PLAT969_ALERT_5_G | The 'Henn et al.' R-Factor-gap value .....                 | 7.966  | Note         |
|                   | Predicted wR2: Based on SigI**2 4.92 or SHELX Weight 12.63 |        |              |

- 
- 0 **ALERT level A** = Most likely a serious problem - resolve or explain  
 2 **ALERT level B** = A potentially serious problem, consider carefully  
 11 **ALERT level C** = Check. Ensure it is not caused by an omission or oversight  
 18 **ALERT level G** = General information/check it is not something unexpected
- 1 ALERT type 1 CIF construction/syntax error, inconsistent or missing data  
 12 ALERT type 2 Indicator that the structure model may be wrong or deficient  
 11 ALERT type 3 Indicator that the structure quality may be low  
 6 ALERT type 4 Improvement, methodology, query or suggestion  
 1 ALERT type 5 Informative message, check
- 
-

It is advisable to attempt to resolve as many as possible of the alerts in all categories. Often the minor alerts point to easily fixed oversights, errors and omissions in your CIF or refinement strategy, so attention to these fine details can be worthwhile. In order to resolve some of the more serious problems it may be necessary to carry out additional measurements or structure refinements. However, the purpose of your study may justify the reported deviations and the more serious of these should normally be commented upon in the discussion or experimental section of a paper or in the "special\_details" fields of the CIF. checkCIF was carefully designed to identify outliers and unusual parameters, but every test has its limitations and alerts that are not important in a particular case may appear. Conversely, the absence of alerts does not guarantee there are no aspects of the results needing attention. It is up to the individual to critically assess their own results and, if necessary, seek expert advice.

### **Publication of your CIF in IUCr journals**

A basic structural check has been run on your CIF. These basic checks will be run on all CIFs submitted for publication in IUCr journals (*Acta Crystallographica*, *Journal of Applied Crystallography*, *Journal of Synchrotron Radiation*); however, if you intend to submit to *Acta Crystallographica Section C* or *E* or *IUCrData*, you should make sure that full publication checks are run on the final version of your CIF prior to submission.

### **Publication of your CIF in other journals**

Please refer to the *Notes for Authors* of the relevant journal for any special instructions relating to CIF submission.

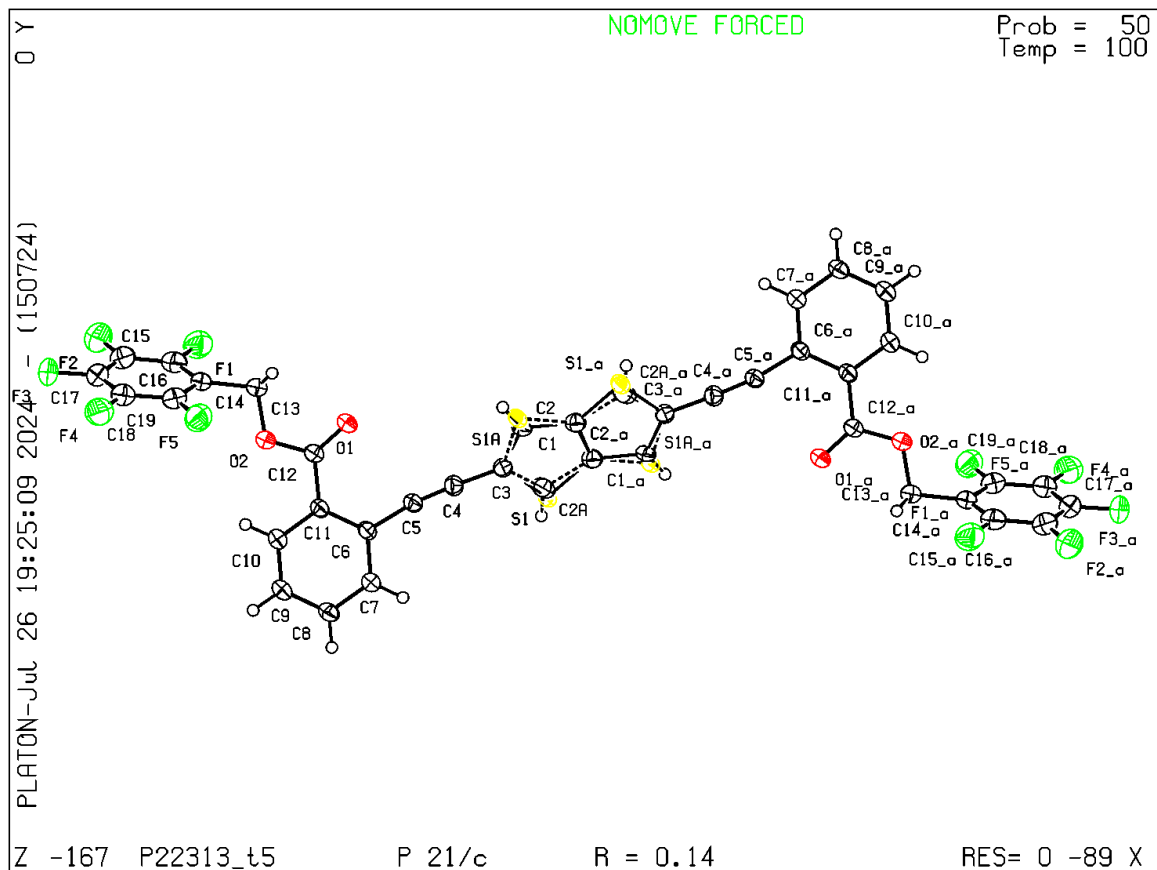

Supplement: d4tc03509g1.zip [file d4tc03509g1.zip]
