# Supplementary material for: Influence of shape on crystal structure and optical properties of heterocyclic conjugated molecules
Source: Royal Society of Chemistry journal article supplement (doi:10.1039/d4tc03509g), 2024-10-31

## checkCIF/PLATON report

Structure factors have been supplied for datablock(s) EG1011498082023

THIS REPORT IS FOR GUIDANCE ONLY. IF USED AS PART OF A REVIEW PROCEDURE FOR PUBLICATION, IT SHOULD NOT REPLACE THE EXPERTISE OF AN EXPERIENCED CRYSTALLOGRAPHIC REFEREE.

No syntax errors found.      CIF dictionary      Interpreting this report

### Datablock: EG1011498082023

---

Bond precision:      C-C = 0.0068 Å

Wavelength=0.71073

Cell:                      a=11.6355 (7)                      b=12.2032 (7)                      c=14.9256 (10)  
                              alpha=101.821 (3)                      beta=104.702 (3)                      gamma=113.286 (3)  
Temperature:      273 K

|                        | Calculated        | Reported          |
|------------------------|-------------------|-------------------|
| Volume                 | 1768.4 (2)        | 1768.36 (19)      |
| Space group            | P -1              | P -1              |
| Hall group             | -P 1              | -P 1              |
| Moiety formula         | C43 H20 F10 O4 S2 | ?                 |
| Sum formula            | C43 H20 F10 O4 S2 | C43 H20 F10 O4 S2 |
| Mr                     | 854.71            | 854.71            |
| Dx, g cm <sup>-3</sup> | 1.605             | 1.605             |
| Z                      | 2                 | 2                 |
| Mu (mm <sup>-1</sup> ) | 0.251             | 0.251             |
| F000                   | 864.0             | 864.0             |
| F000'                  | 865.12            |                   |
| h, k, lmax             | 15, 16, 19        | 15, 16, 19        |
| Nref                   | 8850              | 8821              |
| Tmin, Tmax             | 0.956, 0.975      | 0.940, 0.970      |
| Tmin'                  | 0.951             |                   |

Correction method= # Reported T Limits: Tmin=0.940 Tmax=0.970  
AbsCorr = MULTI-SCAN

Data completeness= 0.997

Theta (max)= 28.370

R(reflections)= 0.0819 ( 5089)

wR2(reflections)=  
0.2847 ( 8821)

S = 1.077

Npar= 534

---

The following ALERTS were generated. Each ALERT has the format

**test-name\_ALERT\_alert-type\_alert-level.**

Click on the hyperlinks for more details of the test.

---

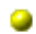

#### Alert level C

|                   |                                                  |         |              |
|-------------------|--------------------------------------------------|---------|--------------|
| PLAT084_ALERT_3_C | High wR2 Value (i.e. > 0.25) .....               | 0.28    | Report       |
| PLAT340_ALERT_3_C | Low Bond Precision on C-C Bonds .....            | 0.00684 | Ang.         |
| PLAT767_ALERT_4_C | INS Embedded LIST 6 Instruction Should be LIST 4 |         | Please Check |
| PLAT905_ALERT_3_C | Negative K value in the Analysis of Variance ... | -13.578 | Report       |
| PLAT905_ALERT_3_C | Negative K value in the Analysis of Variance ... | -1.361  | Report       |
| PLAT910_ALERT_3_C | Missing # of FCF Reflection(s) Below Theta(Min). | 6       | Note         |
|                   | 1 0 0, -1 1 0, 0 1 0, 0 -1 1, -1 0 1,            | 0 0 1,  |              |
| PLAT971_ALERT_2_C | Check Calcd Resid. Dens. 0.09Ang From S001       | 1.54    | eA-3         |

---

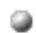

#### Alert level G

|                   |                                                           |       |             |
|-------------------|-----------------------------------------------------------|-------|-------------|
| PLAT072_ALERT_2_G | SHELXL First Parameter in WGHT Unusually Large            | 0.16  | Report      |
| PLAT154_ALERT_1_G | The s.u.'s on the Cell Angles are Equal ..(Note)          | 0.003 | Degree      |
| PLAT199_ALERT_1_G | Reported _cell_measurement_temperature ..... (K)          | 273   | Check       |
| PLAT200_ALERT_1_G | Reported _diffn_ambient_temperature ..... (K)             | 273   | Check       |
| PLAT371_ALERT_2_G | Long C(sp2)-C(sp1) Bond C00I - C00M .                     | 1.43  | Ang.        |
| PLAT371_ALERT_2_G | Long C(sp2)-C(sp1) Bond C00P - C01D .                     | 1.43  | Ang.        |
| PLAT371_ALERT_2_G | Long C(sp2)-C(sp1) Bond C00Q - C010 .                     | 1.41  | Ang.        |
| PLAT371_ALERT_2_G | Long C(sp2)-C(sp1) Bond C016 - C01A .                     | 1.41  | Ang.        |
| PLAT434_ALERT_2_G | Short Inter HL..HL Contact F007 ..F00C .                  | 2.78  | Ang.        |
|                   | 2-x,2-y,1-z =                                             | 2_776 | Check       |
| PLAT720_ALERT_4_G | Number of Unusual/Non-Standard Labels .....               | 79    | Note        |
|                   | S001 S002 F003 F004 F005 F006 F007 F008                   |       |             |
|                   | O009 F00A F00B F00C F00D O00E O00F O00G                   |       |             |
|                   | C00H C00I C00J C00K C00L C00M C00N H00N                   |       |             |
|                   | C00O C00P C00Q C00R C00S C00T C00U C00V                   |       |             |
|                   | H00V C00W C00X C00Y H00Y C00Z C010 C011                   |       |             |
|                   | C012 C013 H01A H01B C014 C015 C016 C017                   |       |             |
|                   | H017 C018 C019 H019 C01A C01B H01C C01C                   |       |             |
|                   | C01D C01E C01F C01G H01G C01H H01D H01E                   |       |             |
|                   | H01F C01I C01J H01J C01K H01H H01I C01L                   |       |             |
|                   | H01K H01L H01M C01M H01N C01N H01O                        |       |             |
| PLAT883_ALERT_1_G | No Info/Value for _atom_sites_solution_primary .          |       | Please Do ! |
| PLAT912_ALERT_4_G | Missing # of FCF Reflections Above STh/L= 0.600           | 21    | Note        |
| PLAT913_ALERT_3_G | Missing # of Very Strong Reflections in FCF ....          | 1     | Note        |
|                   | 3 -2 1,                                                   |       |             |
| PLAT969_ALERT_5_G | The 'Henn et al.' R-Factor-gap value .....                | 8.789 | Note        |
|                   | Predicted wR2: Based on SigI*2 3.24 or SHELX Weight 26.43 |       |             |
| PLAT978_ALERT_2_G | Number C-C Bonds with Positive Residual Density.          | 0     | Info        |

---

- 0 **ALERT level A** = Most likely a serious problem - resolve or explain  
0 **ALERT level B** = A potentially serious problem, consider carefully  
7 **ALERT level C** = Check. Ensure it is not caused by an omission or oversight  
15 **ALERT level G** = General information/check it is not something unexpected
- 4 ALERT type 1 CIF construction/syntax error, inconsistent or missing data

8 ALERT type 2 Indicator that the structure model may be wrong or deficient  
6 ALERT type 3 Indicator that the structure quality may be low  
3 ALERT type 4 Improvement, methodology, query or suggestion  
1 ALERT type 5 Informative message, check

---

---

It is advisable to attempt to resolve as many as possible of the alerts in all categories. Often the minor alerts point to easily fixed oversights, errors and omissions in your CIF or refinement strategy, so attention to these fine details can be worthwhile. In order to resolve some of the more serious problems it may be necessary to carry out additional measurements or structure refinements. However, the purpose of your study may justify the reported deviations and the more serious of these should normally be commented upon in the discussion or experimental section of a paper or in the "special\_details" fields of the CIF. checkCIF was carefully designed to identify outliers and unusual parameters, but every test has its limitations and alerts that are not important in a particular case may appear. Conversely, the absence of alerts does not guarantee there are no aspects of the results needing attention. It is up to the individual to critically assess their own results and, if necessary, seek expert advice.

### **Publication of your CIF in IUCr journals**

A basic structural check has been run on your CIF. These basic checks will be run on all CIFs submitted for publication in IUCr journals (*Acta Crystallographica*, *Journal of Applied Crystallography*, *Journal of Synchrotron Radiation*); however, if you intend to submit to *Acta Crystallographica Section C* or *E* or *IUCrData*, you should make sure that full publication checks are run on the final version of your CIF prior to submission.

### **Publication of your CIF in other journals**

Please refer to the *Notes for Authors* of the relevant journal for any special instructions relating to CIF submission.

---

**PLATON version of 15/07/2024; check.def file version of 15/07/2024**

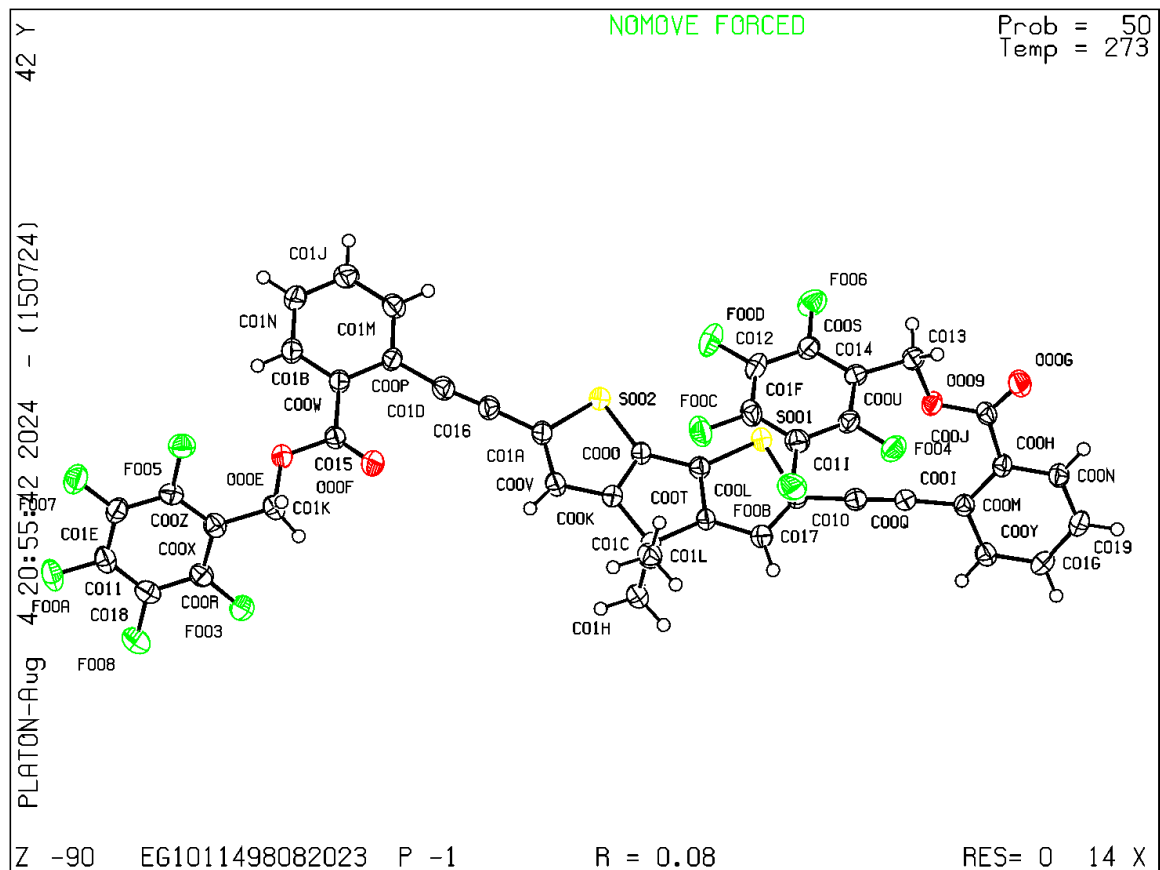

Supplement: d4tc03509g1.zip [file d4tc03509g1.zip]
